# Supplementary material
Source: PubMed Central journal article supplement (PMC7001720)
Supplement: supplementary_ddz273.pdf [file supplementary_ddz273.pdf]

## **Supplementary Materials**

### **Ethnicity-specific and overlapping alterations of brain hydroxymethylome in Alzheimer's disease**

Lixia Qin<sup>1</sup>, Qian Xu<sup>1,2</sup>, Ziyi Li<sup>3</sup>, Li Chen<sup>4</sup>, Yujing Li<sup>5</sup>, Nannan Yang<sup>1</sup>, Zhenhua Liu<sup>1</sup>, Jifeng Guo<sup>1,2,6,7</sup>, Lu Shen<sup>1,2,6,7</sup>, Emily G Allen<sup>5</sup>, Chao Chen<sup>6</sup>, Chao Ma<sup>8</sup>, Hao Wu<sup>3</sup>, Xiongwei Zhu<sup>9,\*</sup>, Peng Jin<sup>5,\*</sup>, Beisha Tang<sup>1,2,6,7,\*</sup>

**Supplementary Figure 1. GO and MSigDB pathway analysis of overlapped DhMRs. A. GO analysis of Chinese-Caucasian DhMRs overlap. B. MSigDB pathway analysis of the overlapping Chinese-Caucasian DhMRs. Blue and red bars represent  $-\log_{10}$  (Binomial p-value).**

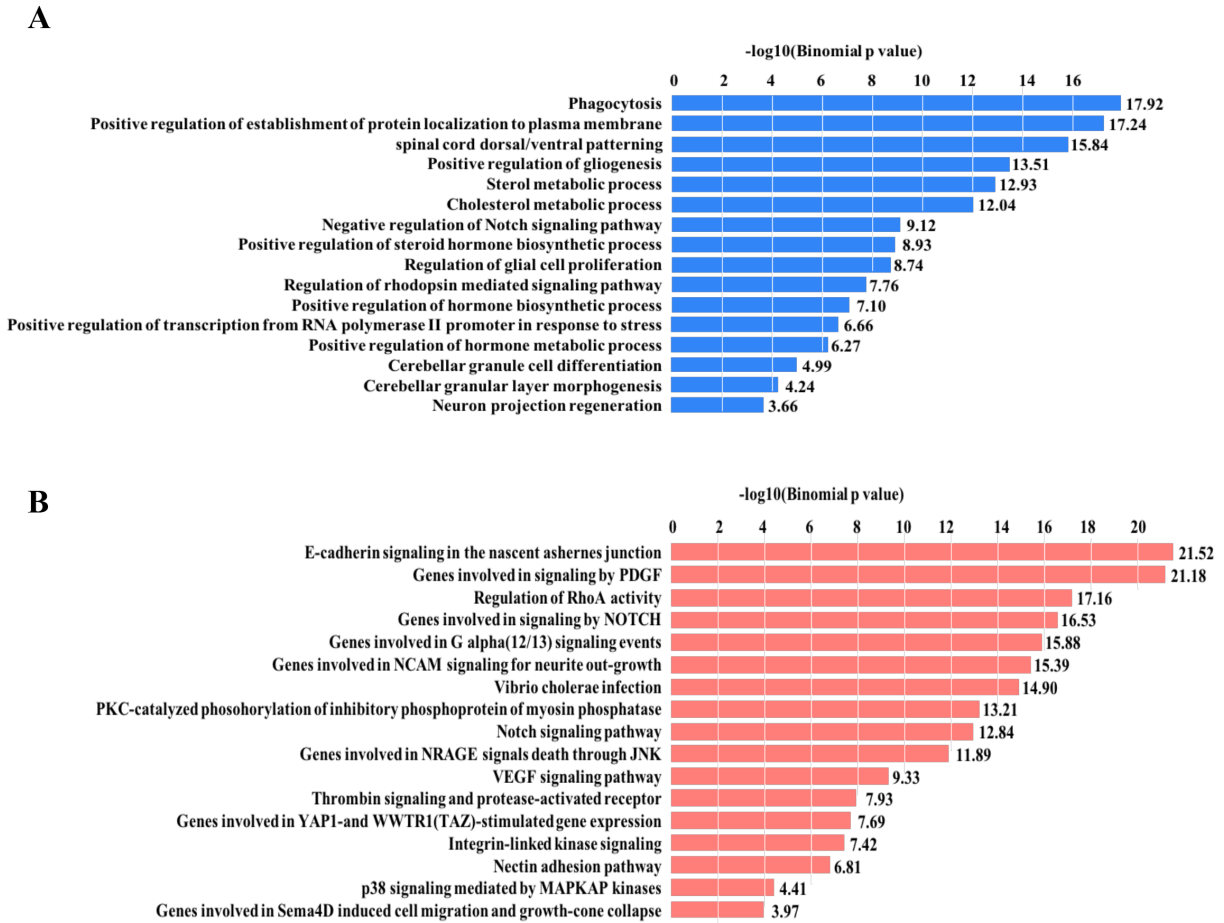

**Supplementary Figure 2. GO and MSigDB pathway analysis of Chinese specific DhMRs. A.**

GO analysis of Chinese specific DhMRs. **B.** MSigDB pathway analysis of Chinese specific DhMRs. Blue and red bars represent  $-\log_{10}$  (Binomial p-value).

**A**

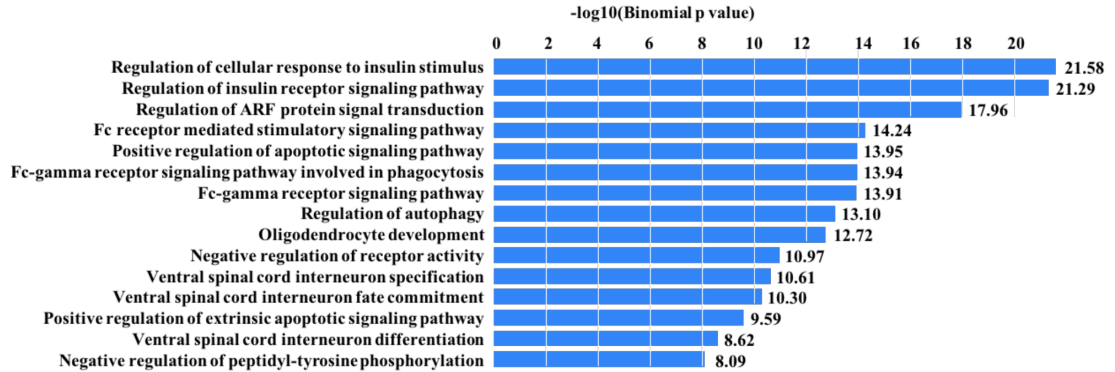

**B**

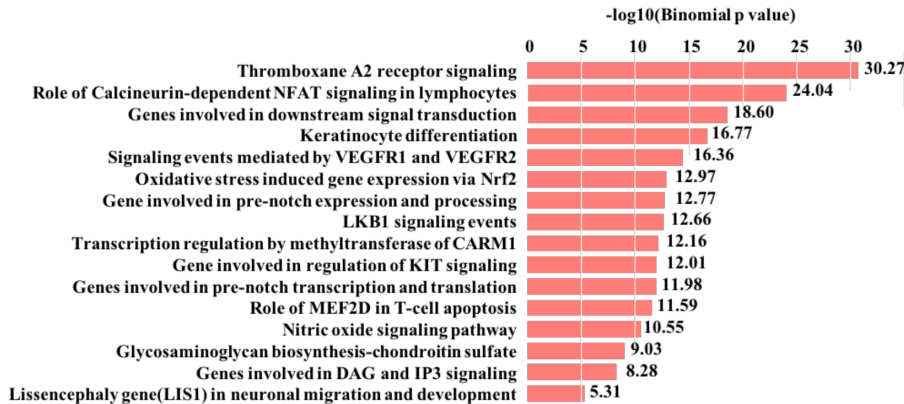

**Supplementary Table 1. Demographic data of AD patients and controls**

|                       | AD       | Control  | <i>P</i> value |
|-----------------------|----------|----------|----------------|
| Number of subjects    | 5        | 5        |                |
| Gender-male/female    | 1/4      | 2/3      | 0.49           |
| Age at death (yr)     | 87.4±7.9 | 84.0±3.5 | 0.403          |
| PMI(hr)               | 4.6±1.2  | 5.7±2.0  | 0.305          |
| Years in storage (yr) | 1.2±0.4  | 1.0±0.4  | 0.484          |
| Braak stage           | V/VI     | I/II     |                |

Abbreviations: yr, year; hr, hour.

**Supplementary Table 2. Details of AD patients and controls included in this study**

|         | <b>ID</b> | <b>Gender</b> | <b>Age at death (yr)</b> | <b>PMI (hr)</b> | <b>Years in storage (yr)</b> | <b>Braak stage</b> | <b>Diseases</b>                                       |
|---------|-----------|---------------|--------------------------|-----------------|------------------------------|--------------------|-------------------------------------------------------|
| AD      | PTB048    | F             | 82                       | 4               | 1.5                          | V/VI               | Chronic pulmonary emphysema, AD                       |
|         | PTB050    | F             | 80                       | 4.5             | 1.4                          | V/VI               | Coronary heart disease, AD                            |
|         | PTB051    | M             | 89                       | 5               | 1.4                          | V/VI               | Arrhythmias, AD                                       |
|         | PTB078    | F             | 86                       | 6.33            | 0.75                         | V/VI               | AD                                                    |
|         | PTB083    | F             | 100                      | 3               | 0.7                          | V/VI               | Hypertension, AD                                      |
| Control | PTB044    | F             | 85                       | 7.5             | 1.5                          | 0                  | Hepatocellular cancer, Hypertension                   |
|         | PTB055    | F             | 84                       | 5               | 1.25                         | I/II               | Coronary heart disease                                |
|         | PTB077    | M             | 87                       | 3.5             | 0.75                         | 0                  | Colon cancer                                          |
|         | PTB080    | F             | 86                       | 4.5             | 0.75                         | V/VI               | Diabetes, Coronary heart disease, Cerebral infarction |
|         | PTB087    | M             | 78                       | 8               | 0.6                          | 0                  | Diabetes, Liver Cirrhosis                             |

Abbreviations: F, female; M, male; yr, year; PMI, postmortem interval; hr, hour.

**Supplementary Table 3. Top 10 binding motifs identified in the DhMRs**

| Group                                  | Motif Name      | Consensus    | P-value   | Log P-value | q-value (Benjamini) | # of Target Sequences with Motif (of 7643) | % of Target Sequences with Motif | # of Background Sequences with Motif (of 41649) | % of Background Sequences with Motif |
|----------------------------------------|-----------------|--------------|-----------|-------------|---------------------|--------------------------------------------|----------------------------------|-------------------------------------------------|--------------------------------------|
| Chinese<br>16,165<br>DhMRs             | c-Myc           | VVCCACGTGG   | 1.00E-36  | -8.52E+01   | 0                   | 12471                                      | 79.92%                           | 25799.8                                         | 75.62%                               |
|                                        | bHLHE40         | KCACGTGMCN   | 1.00E-34  | -8.04E+01   | 0                   | 9144                                       | 58.60%                           | 18308.1                                         | 53.66%                               |
|                                        | HIF-2a          | GCACGTACCC   | 1.00E-33  | -7.72E+01   | 0                   | 9994                                       | 64.05%                           | 20231.1                                         | 59.30%                               |
|                                        | HIF-1a          | TACGTGCV     | 1.00E-32  | -7.46E+01   | 0                   | 8275                                       | 53.03%                           | 16462.3                                         | 48.25%                               |
|                                        | Max             | RCCACGTGGYYN | 1.00E-31  | -7.20E+01   | 0                   | 13429                                      | 86.06%                           | 28181.6                                         | 82.60%                               |
|                                        | c-Myc           | VCCACGTG     | 1.00E-30  | -7.08E+01   | 0                   | 11098                                      | 71.12%                           | 22788.4                                         | 66.79%                               |
|                                        | CLOCK           | GHCACGTG     | 1.00E-29  | -6.78E+01   | 0                   | 12265                                      | 78.60%                           | 25492.1                                         | 74.72%                               |
|                                        | USF1            | SGTCACGTGR   | 1.00E-26  | -6.09E+01   | 0                   | 11500                                      | 73.70%                           | 23815.8                                         | 69.81%                               |
|                                        | n-Myc           | VRCCACGTGG   | 1.00E-23  | -5.32E+01   | 0                   | 13570                                      | 86.96%                           | 28696.7                                         | 84.11%                               |
| Arnt:Ahr                               | TBGCACGCAA      | 1.00E-21     | -4.87E+01 | 0           | 12490               | 80.04%                                     | 26227.7                          | 76.87%                                          |                                      |
| Chinese-s<br>pecific<br>9,665<br>DhMRs | c-Myc/m<br>ES   | VVCCACGTGG   | 1.00E-23  | -5.44E+01   | 0                   | 7226                                       | 78.09%                           | 29795.9                                         | 73.54%                               |
|                                        | c-Myc/L<br>NCAP | VCCACGTG     | 1.00E-18  | -4.27E+01   | 0                   | 6343                                       | 68.54%                           | 25992.1                                         | 64.15%                               |
|                                        | bHLHE40         | KCACGTGMCN   | 1.00E-17  | -4.14E+01   | 0                   | 5196                                       | 56.15%                           | 20910.2                                         | 51.61%                               |
|                                        | CLOCK           | GHCACGTG     | 1.00E-16  | -3.89E+01   | 0                   | 7111                                       | 76.84%                           | 29575.1                                         | 72.99%                               |
|                                        | Max             | RCCACGTGGYYN | 1.00E-16  | -3.74E+01   | 0                   | 7825                                       | 84.56%                           | 32930.8                                         | 81.27%                               |



**Supplementary Table 4. DEGs whose promoter regions binds to HIF-1 $\alpha$ / HIF-2 $\alpha$** 

---

|                         |           |           |              |               |           |
|-------------------------|-----------|-----------|--------------|---------------|-----------|
|                         | MUC2      | LRTOMT    | NFE2L2       | MARCH10       | TRIM35    |
|                         | STAC3     | MIR3165   | ERLIN1       | MIR548W       | NDUFA13   |
|                         | CPXM1     | NUMA1     | SRMS         | TANC2         | CHST3     |
|                         | C19orf57  | PDCD1     | CCSAP        | DOC2GP        | TEX29     |
|                         | TRAIP     | SSUH2     | CRABP1       | TCF20         | RIPK4     |
|                         | CEBPE     | DLK1      | ACTR1A       | CYB561D2      | CDK5      |
|                         | FAM180A   | URI1      | RPS21        | NPRL2         | LINC00222 |
| 78 DEGs whose           | TNNI2     | LOC200772 | DUOXA1       | FKBP1A        | DNAJB2    |
| promoter regions        | ZNF890P   | MIER3     | DUOXA2       | FKBP1A-SDCBP2 | ABCG8     |
| binds to HIF-1 $\alpha$ | LRRC47    | SETD9     | HSPA8        | SDCBP2        | LOC284751 |
|                         | LOC147093 | LINC00163 | DNHD1        | SDCBP2-AS1    | SDHAF1    |
|                         | MUC1      | IGFLR1    | LOC100130348 | KLF6          | LOC151174 |
|                         | ZNF786    | ZNF648    | ZFPL1        | C1QTNF8       | MAF1      |
|                         | ANAPC15   | CDH26     | PUM1         | ELFN1         | RAB11FIP5 |
|                         | IL18BP    | TRA2B     | SNORD103B    | GLI3          |           |
|                         | LAMTOR1   | MIR3128   | SNORD85      | ATP5SL        |           |

---



---

|                         |           |           |              |           |           |
|-------------------------|-----------|-----------|--------------|-----------|-----------|
|                         | RAX2      | NUMA1     | NFE2L2       | PNLIPRP2  | RNF26     |
|                         | C12orf43  | ENPP7     | RAPGEF5      | PUM1      | GLI3      |
|                         | PBX4      | RFX1      | MIR5088      | SNORD103B | TMEM115   |
|                         | HIPK4     | PDCD1     | PRMT1        | SNORD85   | TRIM35    |
|                         | RAPSN     | PRR12     | SRMS         | 10-Mar    | NDUFA13   |
|                         | FAM180A   | SSUH2     | ALOX15B      | MIR548W   | CHST3     |
|                         | TNNI2     | DLK1      | HIST1H4H     | TANC2     | TEX29     |
|                         | UTS2R     | URI1      | CRABP1       | DOC2GP    | PTTG1IP   |
| 90 DEGs whose           | ZNF890P   | SP7       | ACTR1A       | DCAF5     | CDIPT     |
| promoter regions        | SLC6A19   | RHOG      | TRPM5        | PSAP      | CDK5      |
| binds to HIF-2 $\alpha$ | LOC147093 | RAC2      | RPS21        | UBR4      | DNAJB2    |
|                         | MUC1      | LINC00163 | DUOXA1       | TCF20     | PRDX5     |
|                         | MUC5B     | EVPL      | DUOXA2       | CYB561D2  | ABCG8     |
|                         | ANAPC15   | ZNF648    | LRCOL1       | NPRL2     | LOC284751 |
|                         | IL18BP    | GPR45     | HSPA8        | PDZRN3    | SDHAF1    |
|                         | LAMTOR1   | CDH26     | DNHD1        | KLF6      | LOC151174 |
|                         | LRTOMT    | TRA2B     | LOC100130348 | SSR2      | MAF1      |
|                         | MIR3165   | MIR3128   | ZFPL1        | ELFN1     | MT1DP     |

---

---

|               |           |           |              |          |           |
|---------------|-----------|-----------|--------------|----------|-----------|
|               | FAM180A   | PDCD1     | CRABP1       | SNORD85  | TRIM35    |
|               | TNNI2     | SSUH2     | ACTR1A       | MARCH10  | NDUFA13   |
|               | ZNF890P   | DLK1      | RPS21        | MIR548W  | CHST3     |
|               | LOC147093 | URI1      | DUOXA1       | TANC2    | TEX29     |
| Overlapped 55 | MUC1      | LINC00163 | DUOXA2       | DOC2GP   | CDK5      |
| DEGs          | ANAPC15   | ZNF648    | HSPA8        | TCF20    | DNAJB2    |
|               | IL18BP    | CDH26     | DNHD1        | CYB561D2 | ABCG8     |
|               | LAMTOR1   | TRA2B     | LOC100130348 | NPRL2    | LOC284751 |
|               | LRTOMT    | MIR3128   | ZFPL1        | KLF6     | SDHAF1    |
|               | MIR3165   | NFE2L2    | PUM1         | ELFN1    | LOC151174 |
|               | NUMA1     | SRMS      | SNORD103B    | GLI3     | MAF1      |

---

**Supplementary Table 5. Number of DhMRs by DSS and overlaps with DESeq2 results.**

|                                                            | <b># of DhMRs<br/>identified<br/>by DSS</b> | <b># of DhMRs<br/>overlapped with<br/>DESeq2 results</b> | <b>Percentage of<br/>overlaps</b> |
|------------------------------------------------------------|---------------------------------------------|----------------------------------------------------------|-----------------------------------|
| <b>Chinese cohort</b>                                      | 16165                                       | 14201                                                    | 88%                               |
| <b>Chinese cohort overlapped<br/>with Caucasian cohort</b> | 6500                                        | 6147                                                     | 95%                               |
